# Supplementary material for: A novel pH probe based on a rhodamine–rhodamine platform
Source: Royal Society of Chemistry journal article supplement (doi:10.1039/c4ra07555b), 2014-01-01
Supplement: c4ra07555b1.pdf [file c4ra07555b1.pdf]

## Electronic Supplementary Information (ESI)

### A novel pH probe based on rhodamine-rhodanine platform

Xuan-Xuan Zhao<sup>a, †</sup>, Xin-Peng Chen<sup>b, †</sup>, Shi-Li, Shen<sup>a</sup>, Dong-Peng Li<sup>a</sup>, Shuai Zhou<sup>a</sup>,  
Ze-Quan Zhou<sup>a</sup>, Yu-Hao Xiao<sup>a</sup>, Gang Xi<sup>a</sup>, Jun-Ying Miao<sup>b,\*</sup>, Bao-Xiang Zhao<sup>a,\*</sup>

#### 1. Part of optical spectroscopic data.

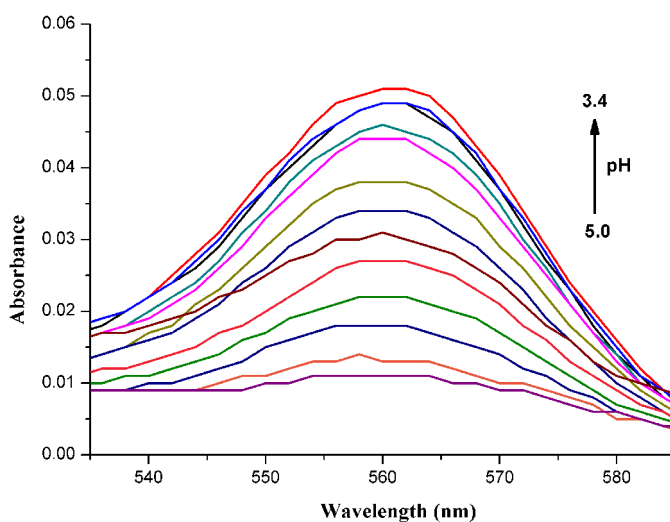

Fig. S1 UV-vis absorbance of **RER** (10 μM) to pH variation in aqueous solvents containing ethanol (B-R buffer-EtOH, v/v = 7:3)

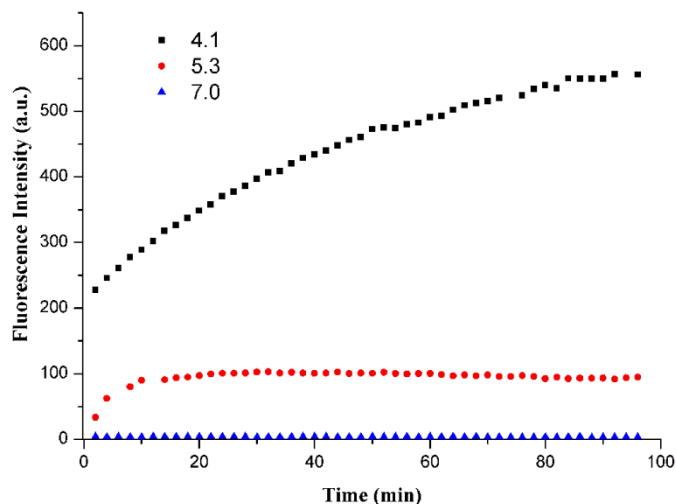

Fig. S2 The time courses of fluorescence intensity of **RER** in aqueous solvents containing ethanol (B-R buffer-EtOH, v/v = 8:2) at various pH values (4.1, 5.3 and 7.0, respectively). ( $\lambda_{\text{ex}} = 561 \text{ nm}$ ,  $\lambda_{\text{em}} = 583.5 \text{ nm}$ )

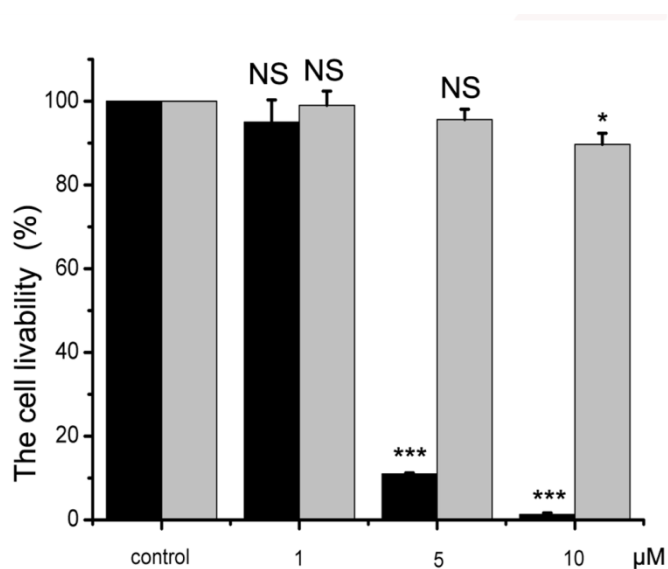

Fig. S3 Cytotoxicity of **RE** (■) and **RER** (□) to HeLa cells. HeLa cells were incubated with 1, 5 and 10  $\mu\text{M}$  **RE** or **RER** respectively for 24 h. The cell viability was determined by SRB assays.

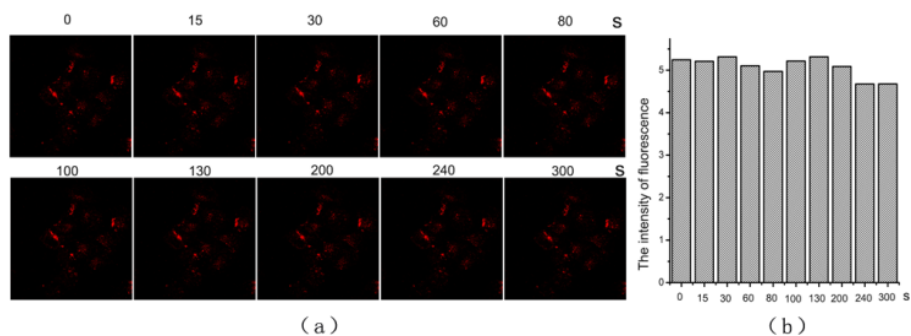

Fig. S4 Photostability of **RER** (5  $\mu$ M). (a) Fluorescence images (0-300 s) were achieved by means of time-sequential scanning of the HeLa cells. (b) Normalized fluorescence intensity of per cell of (a) from 0 to 300 s.

## 2. Characterization data (IR, $^1\text{H}$ & $^{13}\text{C}$ NMR and HRMS) of **RER**.

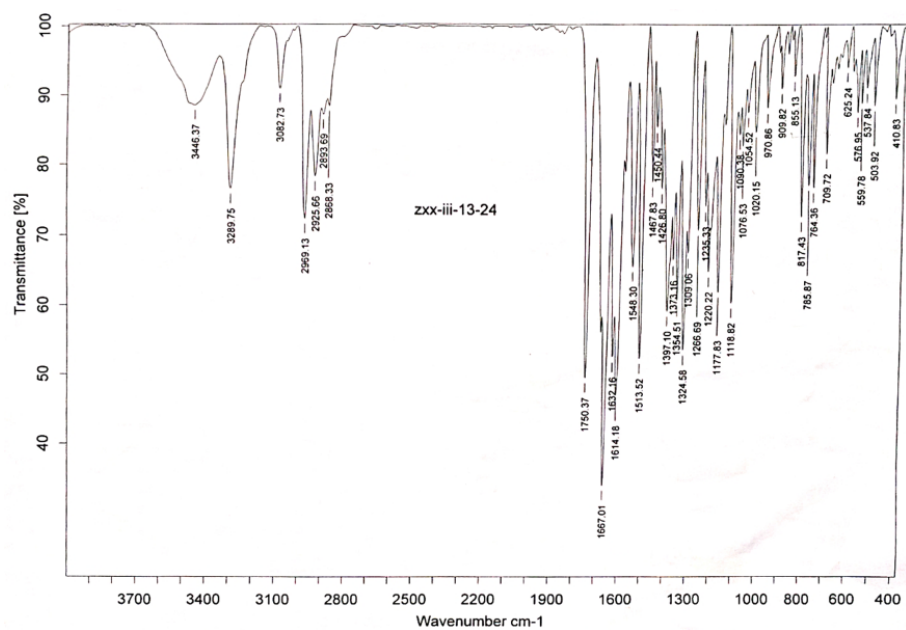

Fig. S5 IR spectrum of **RER**

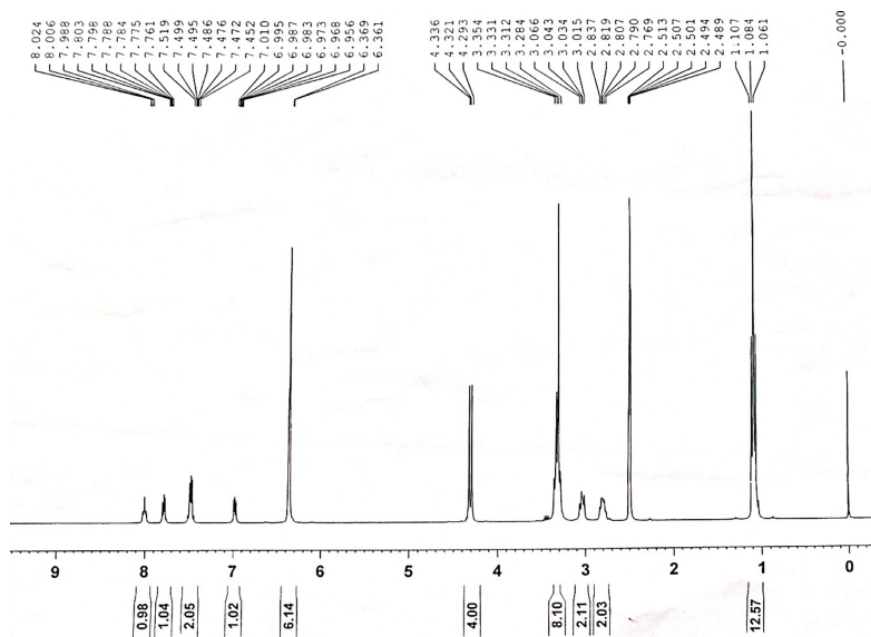

Fig. S6  $^1\text{H}$  NMR spectrum of **RER** in DMSO

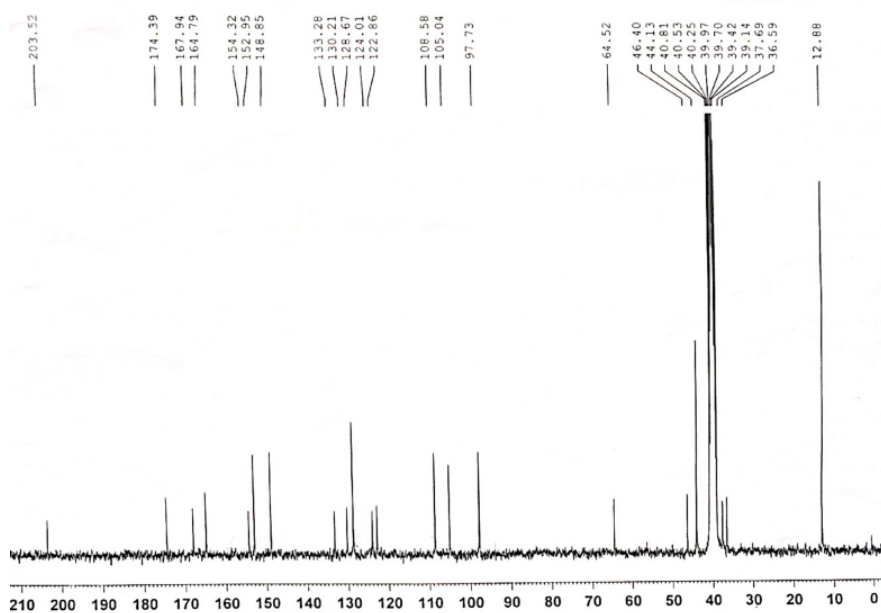

Fig. S7  $^{13}\text{C}$  NMR spectrum of **RER** in DMSO

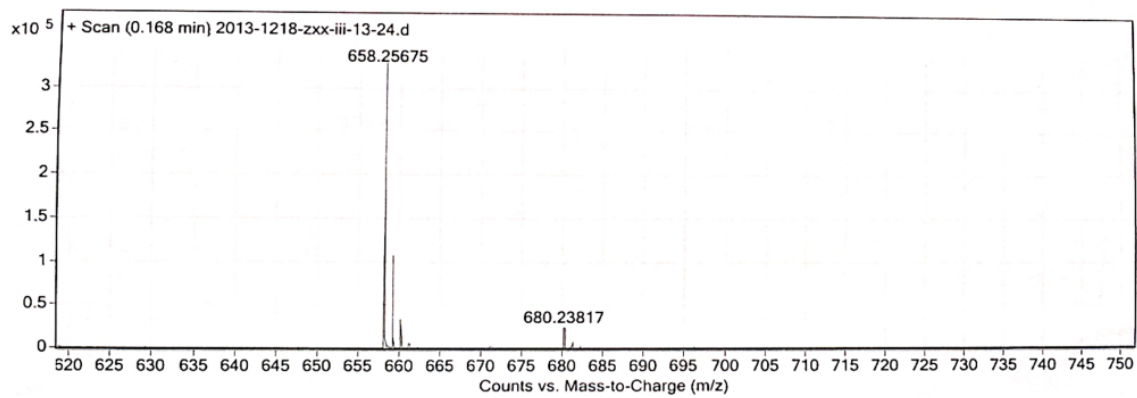

Fig. S8 HRMS spectrum of **RER**
